# Supplementary material for: Development and validation of a rapid psychosocial well-being screening tool in patients with metastatic breast cancer
Source: PubMed Central journal article supplement — Int J Nurs Sci. 2022 Jun 10;9(3):303–12. doi: 10.1016/j.ijnss.2022.06.002 (PMC9305018; doi:10.1016/j.ijnss.2022.06.002), 2022-06-10
Supplement: mmc2.pdf [file mmc2.pdf]

## แบบประเมินความเป็นอยู่ที่ดีทางจิตสังคมสำหรับผู้ป่วยโรคมะเร็งเต้านมระยะแพร่กระจาย

### A rapid psychosocial well-being screening tool in patients with MBC (MBC-PsySoc-Well-being)

คณะผู้วิจัยมีความสนใจเกี่ยวกับคุณภาพชีวิตของคุณในฐานะที่เป็นผู้ป่วยโรคมะเร็งเต้านมระยะแพร่กระจาย (Metastatic Breast Cancer) ที่ประกอบด้วย 3 ด้าน คือ ด้านอารมณ์, ด้านการรับรู้ตนเองและความภาคภูมิใจในตนเอง และ ด้านพฤติกรรม กรุณาตอบคำถามทุกข้อด้วยตัวคุณเอง โดยทำวงกลม ล้อมรอบตัวเลขที่ตรงกับตัวคุณมากที่สุด คำตอบเหล่านั้นไม่มี “ ถูก ” หรือ “ ผิด ” ข้อมูลที่ได้จะเก็บไว้เป็นความลับ

กรุณาใส่ตัวอักษรต้นของชื่อ และอักษรต้นของนามสกุลของคุณ : /...../...../

วันเกิดของคุณ : 

|     |       |    |
|-----|-------|----|
|     |       |    |
| วัน | เดือน | ปี |

วันที่กรอกข้อความ : 

|     |       |    |
|-----|-------|----|
|     |       |    |
| วัน | เดือน | ปี |

|                                                                                                            | ระดับความคิดเห็น |          |             |           |
|------------------------------------------------------------------------------------------------------------|------------------|----------|-------------|-----------|
|                                                                                                            | ไม่เลย           | เล็กน้อย | ค่อนข้างมาก | มากที่สุด |
| 1. ฉันรู้สึกสงสัยในความเจ็บป่วยหรือแนวทางการรักษาอาการเจ็บป่วยของตนเอง                                     | 1                | 2        | 3           | 4         |
| 2. ฉันประเมินตัวเองว่า ยังมีข้อมูลหรือความรู้ไม่เพียงพอเกี่ยวกับโรคหรือแนวทางการรักษาโรค                   | 1                | 2        | 3           | 4         |
| 3. ฉันพยายามค้นหาความรู้หรือข้อมูลเพิ่มเติมเกี่ยวกับโรคหรือแนวทางการรักษาโรค                               | 1                | 2        | 3           | 4         |
| 4. ฉันพยายามทำให้ตัวเองมีร่างกายที่สมบูรณ์แข็งแรง หรือมีจิตใจที่แจ่มใสอยู่เสมอ                             | 1                | 2        | 3           | 4         |
| 5. ฉันปฏิบัติตามคำแนะนำของแพทย์ได้                                                                         | 1                | 2        | 3           | 4         |
| 6. ฉันสามารถปรับเปลี่ยนพฤติกรรมประจำวันชีวิตไปในทางที่ดีขึ้น                                               | 1                | 2        | 3           | 4         |
| 7. ฉันมีกำลังใจที่สำคัญที่ทำให้อยากใช้ชีวิตต่อไป เช่น ครอบครัว ลูก คนรัก หรือความต้องการอยากช่วยเหลือสังคม | 1                | 2        | 3           | 4         |
| 8. ฉันอยากกลับไปใช้ชีวิตในรูปแบบปกติ แม้จะมีภาวะเจ็บป่วย                                                   | 1                | 2        | 3           | 4         |
